# Supplementary material for: Analysis of the Anomalous Signals near the Tropopause before the Overshooting Convective System Onset over the Tibetan Plateau
Source: Hindawi journal article supplement (doi:10.1155/2020/8823446), 2020-09-17
Supplement: f1 [file 8823446.f1.pdf]

```

begin
  path = "/home4/xuxr/2/tian/trop_wmo_data/"

  path1 = "/home4/xuxr/2/tian/maxht20_ge10/"

  year = ispan(2002,2006,1)
  ny    = dimsizes(year)
  mon   = ("/06","07","08"/)
  nm    = dimsizes(mon)

  do i = 0,ny-1
    do j = 0,nm-1
      filename      = path+year(i)+mon(j)+"_trop_lrt.nc"
      print(filename)
      f1            = addfile(filename,"r")
      tot_tropp     = f1->tot_tropp(:,:,1,:)
      tot_troph     = f1->tot_troph(:,:,1,:)
      lon           = tot_tropp&longitude
      lat           = tot_tropp&latitude
      ; printVarSummary(lon)

      nt            = dimsizes(tot_tropp&time)
      printVarSummary(tot_tropp)

      filename1     = path1+year(i)+mon(j)+"_convection_case_TP_sum.hdf"
      f2            = addfile(filename1,"r")
      lon_tp        = f2->lon_tp
      lat_tp        = f2->lat_tp
      ; printVarSummary(lon_tp)
      ; exit
      ntp           = dimsizes(lat_tp)
      ;-----interpol-----
      inter_tropp   = new((/nt,ntp/),float)
      inter_troph   = new((/nt,ntp/),float)
      do k = 0,ntp-1
        do l = 0,nt-1
          if
(lon_tp(k).le.105).and.(lon_tp(k).ge.75).and.(lat_tp(k).le.37).and.(lat_tp(k).ge.27) then
            inter_tropp(l,k) = linint2_points_Wrap(lon,lat,tot_tropp(l,:,:),
False,lon_tp(k),lat_tp(k), 0)
            inter_troph(l,k) = linint2_points_Wrap(lon,lat,tot_troph(l,:,:),
False,lon_tp(k),lat_tp(k), 0)
          end if
          if (lon_tp(k).le.105).and.(lon_tp(k).ge.75).and.(lat_tp(k).lt.27) then

```

```

                                inter_tropp(l,k)    =    linint2_points_Wrap(lon,lat,tot_tropp(l,:,:),
False,lon_tp(k),27, 0)
                                inter_troph(l,k)    =    linint2_points_Wrap(lon,lat,tot_troph(l,:,:),
False,lon_tp(k),27, 0)
                                end if
                                if (lon_tp(k).le.105).and.(lon_tp(k).ge.75).and.(lat_tp(k).gt.37) then
                                    inter_tropp(l,k)    =    linint2_points_Wrap(lon,lat,tot_tropp(l,:,:),
False,lon_tp(k),37, 0)
                                    inter_troph(l,k)    =    linint2_points_Wrap(lon,lat,tot_troph(l,:,:),
False,lon_tp(k),37, 0)
                                end if
                                if (lon_tp(k).gt.105).and.(lat_tp(k).le.37).and.(lat_tp(k).ge.27) then
                                    inter_tropp(l,k)    =    linint2_points_Wrap(lon,lat,tot_tropp(l,:,:),
False,105,lat_tp(k), 0)
                                    inter_troph(l,k)    =    linint2_points_Wrap(lon,lat,tot_troph(l,:,:),
False,105,lat_tp(k), 0)
                                end if
                                if (lon_tp(k).lt.75).and.(lat_tp(k).le.37).and.(lat_tp(k).ge.27) then
                                    inter_tropp(l,k)    =    linint2_points_Wrap(lon,lat,tot_tropp(l,:,:),
False,75,lat_tp(k), 0)
                                    inter_troph(l,k)    =    linint2_points_Wrap(lon,lat,tot_troph(l,:,:),
False,75,lat_tp(k), 0)
                                end if
                                end do
                                end do
                                inter_tropp!0        = "time"
                                inter_tropp!1        = "ntp"
                                inter_tropp&ntp       = ispan(1,ntp,1)
                                inter_tropp&time      = tot_tropp&time

                                inter_troph!0        = "time"
                                inter_troph!1        = "ntp"
                                inter_troph&ntp       = ispan(1,ntp,1)
                                inter_troph&time      = tot_troph&time
                                printVarSummary(inter_tropp)

                                ;-----output-----
                                system("rm                                     -f
/home4/xuxr/2/tian/trop_wmo_data_interpol_grid/"+year(i)+mon(j)+"_trop_inter_lrt.nc")

                                print("/home4/xuxr/2/tian/trop_wmo_data_interpol_grid/"+year(i)+mon(j)+"_trop_inter_lr
t.nc")

                                fout                                     =
addfile("/home4/xuxr/2/tian/trop_wmo_data_interpol_grid/"+year(i)+mon(j)+"_trop_inter_lrt.n

```

```

c","c")

        fout->inter_tropp    =   inter_tropp
        fout->inter_troph    =   inter_troph
        fout->lat_tp         =   lat_tp
        fout->lon_tp         =   lon_tp

        delete(tot_tropp)
        delete(tot_troph)
        delete(lat_tp)
        delete(lon_tp)
        delete(inter_tropp)
        delete(inter_troph)
    end do
end do

end

begin
    path = "/home4/xuxr/2/tian/trop_wmo_data_interpol_grid/"

    path1 = "/home4/xuxr/2/tian/maxht20_ge10/"

    year = ispan(2002,2006,1)
    ny    = dimsizes(year)
    mon   = ("/06","07","08"/)
    ; mon = ("/06"/)
    nm    = dimsizes(mon)

    do iy = 0,ny-1
        do im = 0,nm-1
            filename      =   path+year(iy)+mon(im)+"_trop_inter_lrt.nc"
            print(filename)
            f1             =   addfile(filename,"r")           ;再分析数据:一天四
个时次(00,06,12,18)
            inter_tropp    =   f1->inter_tropp
            inter_troph    =   f1->inter_troph
            time           =   f1->time
            utc_date       =   cd_calendar(time, 0)
            ; day          =   tointeger(utc_date(:,2))
            ; hour         =   tointeger(utc_date(:,3))
            day            =   utc_date(:,2)
            hour           =   utc_date(:,3)
            printVarSummary(inter_troph)

```

```

nt          =   dimsizes(time)

filename1   =   path1+year(iy)+mon(im)+"_convection_case_TP_sum.hdf"
f2          =   addfile(filename1,"r")           ;卫星数据
day_tp      =   f2->day_tp
hour_tp     =   f2->hour_tp
orbit_tp    =   f2->orbit_tp
year_tp     =   f2->year_tp
month_tp    =   f2->month_tp
elev_tp     =   f2->elev_tp
maxht20_tp  =   f2->maxht20_tp
maxht40_tp  =   f2->maxht40_tp
lat_tp      =   f2->lat_tp
lon_tp      =   f2->lon_tp

ntp         =   dimsizes(lat_tp)
;-----interpol-----
inter_tropp_time = new(/ntp/),float)
inter_troph_time = new(/ntp/),float)
do k = 0,ntp-1
    hour1 = new(/2/),float)
    aa = new(/2/),float)
    bb = new(/2/),float)
    do i = 0,nt-1,4
        ;-----再分析 day=卫星 day（不是月末），hour<18 时-----用当天邻
        ;近的两个时次进行插值
        if ((day(i).eq.day_tp(k)).and.(hour_tp(k).lt.18)) then
            n = floattointeger(hour_tp(k)/6.0)
            print(day_tp(k)+" "+hour_tp(k))
            print(i+" "+n)
            print(day(i))
            print("k  "+k)

            ;                               indices                               =
ind((utc_date(:,2).eq.day_tp(k)).and.(utc_date(:,3).ge.hour(i+n)).and.(utc_date(:,3).le.hour(i+n+1)
))

            aa(0) = inter_tropp(i+n,k)
            aa(1) = inter_tropp(i+n+1,k)
            bb(0) = inter_troph(i+n,k)
            bb(1) = inter_troph(i+n+1,k)
            ; bb = inter_troph(indices,k)
            hour1(0) = hour(i+n)
            hour1(1) = hour(i+1+n)

```

```

inter_tropp_time(k) = linint1_Wrap(hour1,aa(:),
False,hour_tp(k), 0)
inter_troph_time(k) = linint1_Wrap(hour1,bb(:),
False,hour_tp(k), 0)
end if
;-----再分析 day=卫星 day（不是月末）， hour>18 时-----用当天 18
时和第二天 0 时插值
if
((day(i).eq.day_tp(k)).and.(hour_tp(k).gt.18.and.(day_tp(k).ne.day(nt-1)))) then
; print(i)
; indices = ind((utc_date(:,2).eq.day(k)).and.(utc_date(:,3).eq.18))
aa = new((/2/),float)
bb = new((/2/),float)
aa(0) = inter_tropp(i+3,k)
aa(1) = inter_tropp(i+3+1,k)
bb(0) = inter_troph(i+3,k)
bb(1) = inter_troph(i+3+1,k)
hour1(0) = 18
hour1(1) = 24
inter_tropp_time(k) = linint1_Wrap(hour1,aa(:),
False,hour_tp(k), 0)
inter_troph_time(k) = linint1_Wrap(hour1,bb(:),
False,hour_tp(k), 0)
delete([aa,bb/])
end if
;-----再分析 day=卫星 day（月末）， hour>18 时-----用当天（月
末） 18 时和下一个 月第一天 0 时插值
if
((day(i).eq.day_tp(k)).and.(day_tp(k).eq.day(nt-1)).and.(hour_tp(k).gt.18.)) then
filename2 =
path+year(iy+1)+mon(im)+"_trop_inter_lrt.nc"
f3 = addfile(filename2,"r")
inter_tropp_01 = f3->inter_tropp
inter_troph_01 = f3->inter_troph
; ntp1 = dimsizes(inter_tropp_01(0,:))
aa = new((/2/),float)
bb = new((/2/),float)
; print(i)
; indices = ind((utc_date(:,2).eq.day(k)).and.(utc_date(:,3).eq.18))

aa(0) = inter_tropp(i+3,k)
aa(1) = inter_tropp_01(0,k)
bb(0) = inter_troph(i+3,k)
bb(1) = inter_troph_01(0,k)

```

```

        hour1(0) = 18
        hour1(1) = 24
        inter_tropp_time(k)      =      linint1_Wrap(hour1,aa(:),
False,hour_tp(k), 0)
        inter_troph_time(k)      =      linint1_Wrap(hour1,bb(:),
False,hour_tp(k), 0)

        delete([/aa,bb,inter_tropp_01,inter_troph_01/])
    end if
end do
end do
inter_tropp_time!0      = "ntp"
inter_tropp_time&ntp    = ispan(1,ntp,1)

inter_troph_time!0      = "ntp"
inter_troph_time&ntp    = ispan(1,ntp,1)
printVarSummary(inter_tropp_time)

;-----output-----
system("rm                                          -f
/home4/xuxr/2/tian/trop_wmo_data_interpol_time/"+year(iy)+mon(im)+"_trop_inter_final_lrt.n
c")

print("/home4/xuxr/2/tian/trop_wmo_data_interpol_time/"+year(iy)+mon(im)+"_trop_inte
r_final_lrt.nc")
fout                                          =
addfile("/home4/xuxr/2/tian/trop_wmo_data_interpol_time/"+year(iy)+mon(im)+"_trop_inter_f
inal_lrt.nc","c")
fout->orbit_tp      = orbit_tp
fout->lat_tp        = lat_tp
fout->lon_tp        = lon_tp
fout->year_tp       = year_tp
fout->month_tp      = month_tp
fout->day_tp        = day_tp
fout->hour_tp       = hour_tp
fout->elev_tp       = elev_tp
fout->maxht20_tp    = maxht20_tp
fout->maxht40_tp    = maxht40_tp
fout->inter_tropp_time = inter_tropp_time
fout->inter_troph_time = inter_troph_time

delete(inter_tropp)
delete(inter_troph)

```

```
        delete(lat_tp)
        delete(lon_tp)
        delete(inter_tropp_time)
        delete(inter_troph_time)

        delete([/year_tp,month_tp,day_tp,hour_tp,elev_tp,maxht20_tp,maxht40_tp,orbit_tp,time,
utc_date,day,hour/])
            end do
        end do

end
```
